# Supplementary material for: Genomic, biochemical and expressional properties reveal strong conservation of the CLCA2 gene in birds and mammals
Source: PeerJ journal article supplement (doi:10.7717/peerj.14202), 2022-11-08

**Original, uncropped Blots**

**Figure 3**

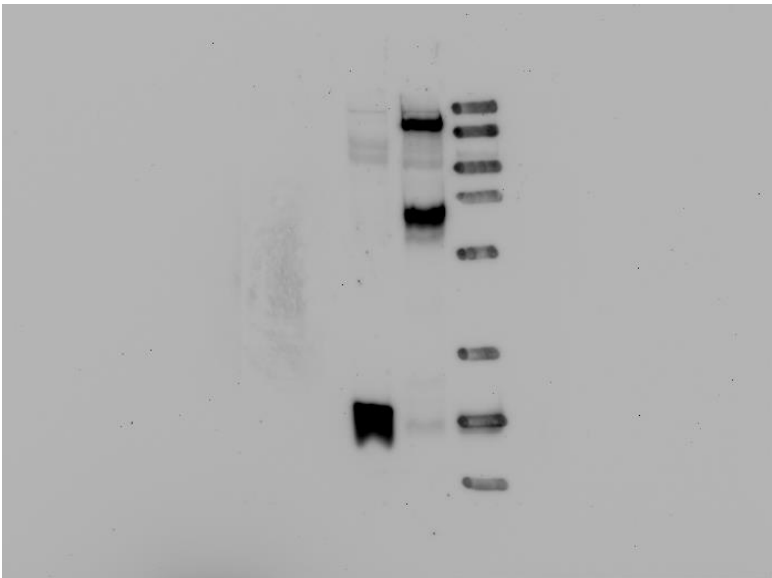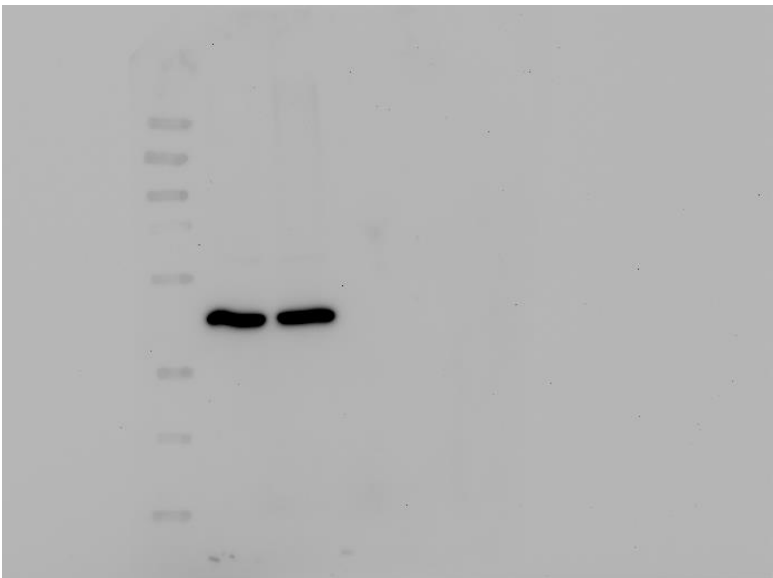

**Figure 4**

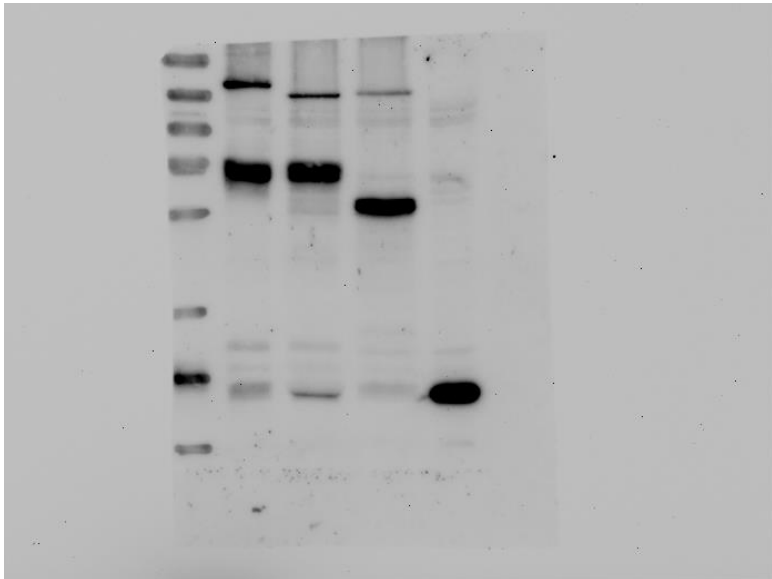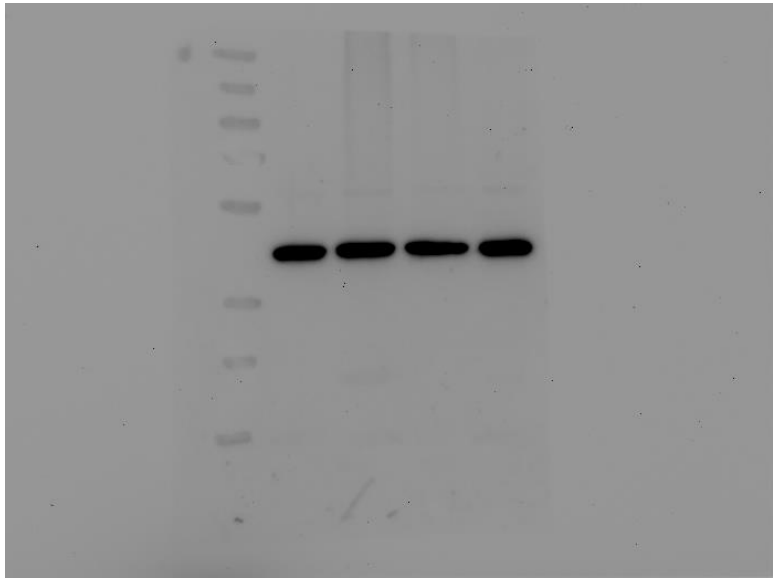

Supplement: S7original_blots_.pdf [file S7original_blots_.pdf]
